# Supplementary material for: A new twist on sea silk: the peculiar protein ultrastructure of fan shell and pearl oyster byssus
Source: Royal Society of Chemistry journal article supplement (doi:10.1039/c8sm00821c), 2018-01-01
Supplement: c8sm00821c1.pdf [file c8sm00821c1.pdf]

## Supplementary data

**Table 1** distance (q) between the meridional diffractions and the transmitted beam on SAXD of *A.pectinata*, *P.fucata* and *P.nobilis* byssus fibers, in nm<sup>-1</sup>

|                                            | layerline  | <i>A.pectinata</i> | <i>P. fucata</i> | <i>P.nobilis</i> |
|--------------------------------------------|------------|--------------------|------------------|------------------|
| Diffraction position q [nm <sup>-1</sup> ] | 1          |                    |                  |                  |
|                                            | 2          | 0.852±0.006        | 0.826±0.005      | 0.862±0.015      |
|                                            | 3          | 1.199±0.005        |                  | 1.231±0.009      |
|                                            | 4          | 1.593±0.004        | 1.584±0.005      | 1.622±0.007      |
|                                            | 5          |                    |                  |                  |
|                                            | 6          |                    |                  |                  |
|                                            | 7          |                    | 2.700±0.010      |                  |
|                                            | 8          | 3.174±0.015        | 3.138±0.011      | 3.220±0.011      |
|                                            | 9          |                    |                  |                  |
|                                            | 10         |                    |                  |                  |
|                                            | 11         | 4.338±0.010        | 4.288±0.013      |                  |
|                                            | 12         | 4.750±0.014        | 4.726±0.013      |                  |
|                                            | 13         |                    |                  |                  |
|                                            | 14         | 5.552±0.014        | 5.421±0.015      | 5.587±0.017      |
|                                            | 15         | 5.952±0.021        | 5.869±0.015      | 6.011±0.038      |
|                                            | 16         |                    |                  |                  |
|                                            | 17         |                    | 6.583±0.017      | 6.860±0.113      |
|                                            | 18         |                    | 7.006±0.013      |                  |
|                                            | 19         |                    | 7.455±0.011      |                  |
|                                            | 20         |                    |                  |                  |
|                                            | 21         |                    |                  | 8.240±0.014      |
|                                            | 22         |                    |                  |                  |
|                                            | unassigned | 3.033±0.018        |                  |                  |
